# Supplementary material for: Synthesis and characterization of high surface area CuWO4 and Bi2WO6 electrodes for use as photoanodes for solar water oxidation
Source: Royal Society of Chemistry journal article supplement (doi:10.1039/c3ta10245a), 2013-01-01
Supplement: c3ta10245a.pdf [file c3ta10245a.pdf]

# Synthesis and Characterization of High Surface Area $\text{CuWO}_4$ and $\text{Bi}_2\text{WO}_6$ Electrodes for use as Photoanodes for Solar Water Oxidation

*James C. Hill<sup>a</sup> and Kyoung-Shin Choi<sup>b,\*</sup>*

<sup>a</sup>Department of Chemistry, Purdue University, West Lafayette, IN 47907, USA

<sup>b</sup>Department of Chemistry, University of Wisconsin-Madison, Madison, WI 53706, USA

## **SUPPORTING INFORMATION**

*\*To whom correspondence should be addressed. Email: kschoi@chem.wisc.edu; Tel: 1- 608-262-5859; Fax: 1- 608-262-0453.*

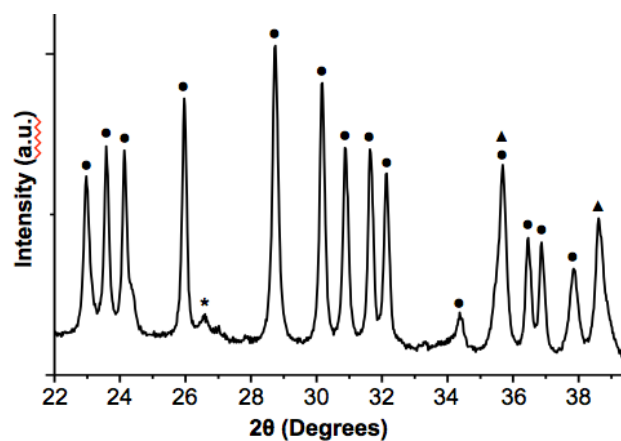

**Figure S1.** XRD pattern of a  $\text{Cu}^{2+}$ -containing  $\text{WO}_3$  electrode annealed at 550 °C for 6 hours before the removal of  $\text{CuO}$  in acid. Peaks from the FTO substrate,  $\text{CuWO}_4$ , and  $\text{CuO}$  are denoted by \*, • and ▲, respectively.

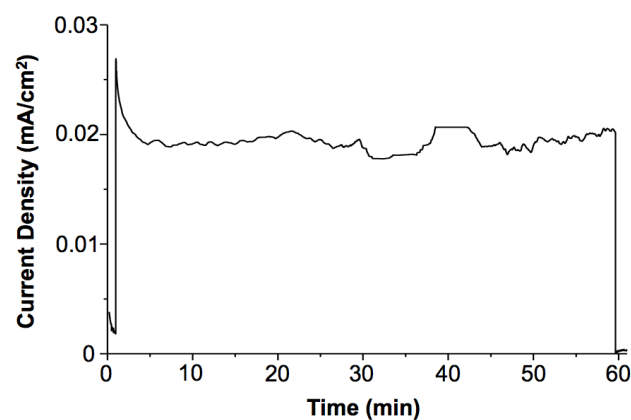

**Figure S2.** Photocurrent-time plot of a  $\text{CuWO}_4$  electrode measured in 0.1 M sodium phosphate buffer (pH 7) at 0.42 V vs.  $\text{Ag/AgCl}$  (1.03 V vs. RHE) (AM 1.5G, 100  $\text{mW/cm}^2$  illumination).

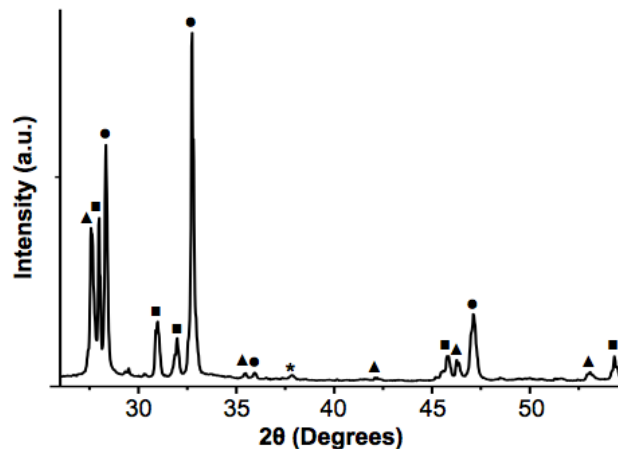

**Figure S3.** XRD pattern of a  $\text{Bi}^{3+}$ -containing  $\text{WO}_3$  electrode annealed at 550 °C for 6 hours before the removal of  $\text{Bi}_2\text{O}_3$ . Peaks from the FTO substrate,  $\text{Bi}_2\text{WO}_6$ , and  $\text{Bi}_2\text{O}_3$  are denoted by \*, • and ▲, respectively. The peaks denoted by ■ are peaks from Bi-rich Bi-W-O ternary phases such as  $\text{Bi}_{3.84}\text{W}_{0.16}\text{O}_{6.24}$ , which can also be removed with  $\text{Bi}_2\text{O}_3$  in acid, leaving a pure  $\text{Bi}_2\text{WO}_6$  electrode.

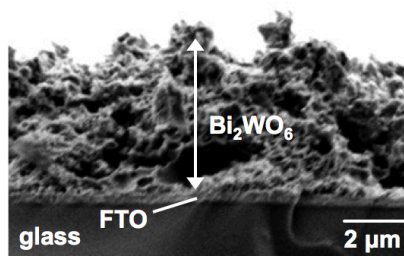

**Figure S4.** Side-view SEM image of a  $\text{Bi}_2\text{WO}_6$  electrode.
